# Supplementary material for: Traditional Birth Attendants Knowledge of Delivery And Its Danger Signs: A One-On- One Interview
Source: Research Square preprint supplement (doi:10.21203/rs.3.rs-5620911/v1), 2025-04-15
Supplement: Supplementary file 1 [file 6326a6a830f3c05616b8db97.docx]

**INTERVIEW QUESTIONNAIRE**

## PROPOSED STUDY QUESTIONNAIRE

Good day Sir/Ma,

I am ALIYU FULLAILA ONOZARE, a lecturer from the University of Ilorin, Department of Clinical Pharmacy and Pharmacy Practice, conducting research on: Traditional Birth Attendance Knowledge of Delivery And Its Danger Signs: A One-On-One Interview.

This study aim to: assess your knowledge on labor, how you take delivery and the danger signs of delivery.

ALIYU FULLAILA O 07039392913

Researcher’s name and signature Date Phone No

**Patient’s informed consent:**

I have provided true and reliable personal information, and fully understand the indication and intended purpose of the research. The research has been explained to me and answers have been provided to all my questions.

Participant’s thumb print/ signature Date Phone No

ALIYU FULLAILA O 07039392913

Researcher’s name and signature Date Phone No

**INTERVIEW QUESTIONNAIRE**

**Section 1: Demographic Information of TBAs**

Age: ­­­­_________________________________

Gender: Male ( ) Female ( )

Marital Status: Single ( ) Married ( ) Widowed ( ) Divorced ( )

Educational Level: Non-formal ( ) Primary ( ) Secondary ( ) Tertiary ( )

Religion: Islam ( ) Christianity ( ) Traditional ( ) Islam/Traditional ( ) Christianity/ Traditional ( )

Occupation: _____________________

Address:________________________ L.G.A__________________________

State of Origin:_________________________

Do you have another job besides being a TBA? Yes ( ) No ( )

If yes, what is your other job? ________________________

Years of Experience as a Traditional Birth Attendant (TBA):

Less than 1 year ( ) 1-5 years ( ) 6-10 years ( ) More than 10 years ( )

Number of births attended monthly:

Less than 10 ( ) 10-20 ( ) 21-30 ( ) More than 30 ( )

**Section 2: Knowledge of Labor/ delivery**

1. How many stages is labor divided into?__________________________
2. What are the symptom(s) of a woman in labor? ________________________________________________________________________________________________________________________________________________________________________________________________________________________
3. Describe the start of labor (first stage of labor) ________________________________________________________________________________________________________________________________________________________________________________________________________________________
4. How do you know the pregnant woman is fully dilated/ ready to deliver?

(2nd stage of labor) ________________________________________________________________________________________________________________________________________________________________________________________________________________________

1. What do you use for vaginal examination______________________________________________________________
2. Fetal monitoring and fetal positioning: How do you know if the fetus is in the correct positioning during delivery (cephalic position), or otherwise (breech) ________________________________________________________________________________________________________________________________________________________________________________________________________________________
3. Describe what you use to induce or assist a woman in labor (e.g. use medication (orthodox e.g. misoprostol, oxytocin, ergometrin) or herbal remedies (e.g. *Ocimum gratissimum, Vernonia amygdalina*, and *Jatropha curcas*) or incantation ________________________________________________________________________________________________________________________________________________
4. Are vital signs (B.P, pulse, RR, e.t.c) usually done for pregnant women__________________________________________________________________________________________________________________________________________
5. After delivery of the baby (fetus) what do you do?_____________________________________________________________________________________________________________________________________________
6. How do you cut and clamp the fetal cord (placenta)________________________________________________________________________________________________________________________________________
7. What methods do you use to manage the removal of placenta (third stage of labor)?_________________________________________________________________________________________________________________________________________

Do you use medication (orthodox e.g. misoprostol, oxytocin, ergometrin) or herbal remedies (e.g. *Ocimum gratissimum, Vernonia amygdalina*, and *Jatropha curcas*) or incantation do you use during and after delivery of the placenta?______________________________________________________________________________________________________________________________________

1. After delivery of the fetus how long does it take for the placenta to come out from your experience? ________________________________________________________________________
2. How often in your practice does the uterus not contract to remove the placenta after delivery of the baby? ________________________________________________________________________________________________________________________________________________
3. What do you do if the placenta does not get expelled from the uterus after delivery of the baby (fetus)?_________________________________________________________________
4. If you use medication (orthodox), do you know how to administer it yourself?________________________________________________________________
5. Excessive bleeding after delivery (Post-partum hemorrhage)_____________________________________________________________________________________________________________________________________

How much bleeding is too much___________________________________________________________________________________________________________________________________________

1. How do you manage women who are bleeding excessively______________________________________________________________________________________________________________________________________
2. What do you do if bleeding continues? ________________________________________________________________________
3. Danger signs of labor___________________________________________________________________________________________________________________________________________

- Prolonged labor_____________________________________________________________
- Vaginal bleeding___________________________________________________________
- Infection__________________________________________________________
- Severe back pain______________________________________________________________
- Nausea/vomiting____________________________________________________

1. In case of emergency_______________________________________________________________________________________________________________________________________________________________________________________________________________

How did you manage complications during the delivery of the placenta (third stage of labor) (e.g. if the prolonged labor, excessive bleeding, when the placenta does not get expelled and other danger signs of labor)?______________________________________________________________

1. What training have you received on managing the delivery/labor? (Select all that apply)

 Formal training

 Informal apprenticeship

 Workshops/seminars

Others (please specify) ___________________________

1. How willing are you to seek additional training or support in managing labor?

Very willing ( ) Willing ( ) Neutral ( ) Not very willing ( ) Not willing at all ( )

REFERENCE

1. Camey XC, Barrios CG, Guerrero XR, Nuñez-Urquiza RM, Hernández DG, Glass AL. Traditional birth attendants in Mexico: advantages and inadequacies of care for normal deliveries. Social science & medicine. 1996 Jul 1;43(2):199-207.
2. Esan DT, Ayenioye OH, Ajayi PO, Sokan-Adeaga AA. Traditional birth attendants’ knowledge, preventive and management practices for postpartum haemorrhage in Osun State, Southwestern Nigeria. Scientific Reports. 2023 Jul 29;13(1):12314.
3. Sowunmi CO, Olajide AO, Olorunfemi O, Iwaola OM, Adeyemo OF. Enhancing knowledge of traditional birth attendants for the identification of selected labor emergencies. Afr. J. Health Nurs. Midwifery. 2021;4(3):1-4.
4. Kaingu CK, Oduma JA, Kanui TI. Practices of traditional birth attendants in Machakos District, Kenya. Journal of ethnopharmacology. 2011 Sep 1;137(1):495-502.
5. Hutchison J, Mahdy H. Stages of labor.
